# Supplementary material
Source: publisher figshare collection journal article supplement (https://gsajournals.figshare.com/ndownloader/files/28950342)
Supplement: Supplementary file 1 [file 28950342]

## Sheet: Sheet1
TFs	% in User set	p value	Target Genes
Pho4p	0.5833	9e-15	ADH3 ASH1 C1_10170W_A C2_01630W_A C2_09420W_A C2_10650W_AC3_01100W_A C3_04650W_A C3_07470W_A C4_03960W_A C5_03440W_AC5_03690W_A C6_04420W_A C7_01650W_A CDC20 CR_06310W_A ERG1 FTH1HAK1 HOF1 HPD1 IFA14 IHD1 IQG1 MEP1 MET14 MMS21 MOB1 NGT1 OPT7 PHHBPHR1 QDR1 TRY6 XYL2
Nrg1p	0.5167	1.435e-12	C1_01930W_A C1_10170W_A C1_11990W_A C2_05960C_A C2_09420W_AC3_01100W_A C3_07470W_A C6_01940W_A C6_04420W_A C7_01390W_ACR_01440C_A CR_02890C_A CR_04770C_A CR_05210W_A CR_06310W_A ERG3FTH1 HPD1 IFA14 IHD1 IQG1 MET14 MET3 MMS21 MOB1 NGT1 OPT7 PHR1 QDR1TRY6 YOX1
Ron1p	0.6	7.371e-12	ADH3 C1_10170W_A C1_10520W_A C1_11990W_A C2_01630W_AC2_09420W_A C2_10600W_A C2_10650W_A C3_01100W_A C3_04650W_AC3_07470W_A C4_03000C_A C4_03960W_A C5_03440W_A C5_03690W_AC7_03560W_A CR_02890C_A CR_04770C_A CR_05210W_A CR_06310W_ACR_08580C_A ERG1 ERG3 HAK1 HOF1 HPD1 IFA14 IHD1 MET3 MMS21 NGT1 OPT7PHR1 WOR2 XYL2 YOX1
Tye7p	0.4333	1.0546e-10	C1_01930W_A C1_11990W_A C1_14190C_A C2_01630W_A C2_10600W_AC4_00990W_A C4_03000C_A C6_04420W_A C7_01650W_A CDC20 CR_01440C_ACR_02890C_A CR_05210W_A ERG1 ERG3 IHD1 MEP1 MET14 MET3 PGA48 PHHBPHR1 QDR1 XYL2 YOX1 ZSF1
Cas5p	0.35	2.1783e-10	C1_11990W_A C2_01630W_A C2_09420W_A C4_03000C_A C4_03960W_AC5_03440W_A C6_04190C_A C6_04420W_A C7_01390W_A C7_04140C_ACR_01440C_A HAK1 IFA14 MEP1 MET14 OPT7 PHR1 QDR1 TRY6 WOR2 YOX1
Ndt80p	0.3667	5.31108e-10	C1_01930W_A C1_11990W_A C1_14190C_A C2_09420W_A C4_03000C_AC4_03960W_A C6_04190C_A C6_04420W_A C7_03560W_A CR_01440C_A ERG3FTH1 IFA14 IHD1 MEP1 MET3 OPT7 PHR1 TRY6 WOR2 XYL2 ZSF1
Fkh2p	0.3167	2.04827e-09	ASH1 C1_11990W_A C1_14190C_A C3_07470W_A C4_03000C_ACR_04770C_A CR_05210W_A ERG1 FTH1 HAK1 IFA14 IHD1 MEP1 MET14 MET3NGT1 PGA48 QDR1 XYL2
Snf5p	0.15	2.2089e-09	ASH1 C1_11990W_A C6_04420W_A CR_01440C_A ERG3 IHD1 QDR1 XYL2ZSF1
Rim101p	0.2333	5.92572e-09	ADH3 C1_14190C_A C4_00990W_A C6_04420W_A C7_01390W_A CDC20FTH1 IHD1 IQG1 MET14 MET3 NGT1 PGA48 PHR1
Mcm1p	0.3833	1.45615e-08	ADH3 ASH1 C1_10170W_A C1_11990W_A C2_01630W_A C2_10600W_AC3_01100W_A C3_07470W_A C7_03560W_A CDC20 CR_04770C_A CR_05210W_ACR_06310W_A ERG3 HOF1 IHD1 IQG1 MOB1 QDR1 WOR2 XYL2 YOX1 ZSF1
Sfl1p	0.3833	3.51316e-08	ASH1 C1_01930W_A C1_10520W_A C1_11990W_A C1_14190C_AC3_07470W_A C6_01940W_A C6_04190C_A C6_04420W_A C7_01390W_ACR_01440C_A CR_04770C_A CR_05210W_A ERG1 FTH1 IHD1 MEP1 MET3 NGT1PGA48 PHR1 QDR1 WOR2
Rca1p	0.2167	5.91375e-08	ADH3 C1_11950W_A C2_05960C_A C3_04650W_A C6_04420W_AC7_03560W_A HPD1 IHD1 MEP1 NGT1 OPT7 TRY6 XYL2
Skn7p	0.25	7.9611e-08	C1_01930W_A C1_10170W_A C1_11990W_A C1_14190C_A C3_01100W_ACR_05210W_A HAK1 IFA14 IHD1 MET3 OPT7 PGA48 PHR1 WOR2 YOX1
Cph2p	0.15	2.46204e-07	C1_01930W_A C1_10170W_A C4_03000C_A C6_01940W_A C6_04420W_AC7_03560W_A CR_01440C_A PGA48 ZSF1
Tec1p	0.2	3.14228e-07	C1_11990W_A C3_01100W_A C4_03000C_A C6_04420W_A CR_01440C_ACR_05210W_A ERG3 HOF1 IHD1 PHR1 XYL2 YOX1														x
Upc2p	0.2167	3.91379e-07	C3_01100W_A C4_00990W_A C6_04420W_A C7_04140C_A ERG1 ERG3FTH1 HAK1 IHD1 MET14 MET3 PHR1 ZSF1
Sko1p	0.3333	5.10214e-07	C1_14190C_A C2_05960C_A C2_10650W_A C4_03000C_A C7_01390W_AC7_01650W_A CR_02890C_A CR_04770C_A ERG1 ERG3 FTH1 HAK1 IHD1 MEP1MET14 MET3 PHR1 QDR1 XYL2 ZSF1
Sfl2p	0.3167	7.31259e-07	C1_11990W_A C1_14190C_A C2_10600W_A C4_03000C_A C4_03960W_AC6_04190C_A C6_04420W_A C7_03560W_A CR_05210W_A ERG1 ERG3 FTH1 IFA14IHD1 NGT1 OPT7 PHR1 WOR2 YOX1
Csr1p	0.2	7.91984e-07	C1_01930W_A C2_05960C_A C3_07470W_A C7_03560W_A CR_04770C_AERG1 ERG3 FTH1 IHD1 MET3 QDR1 ZSF1
Efg1p	0.3167	1.35187e-06	ADH3 C1_11990W_A C3_07470W_A C4_03000C_A C7_03560W_ACR_01440C_A ERG1 ERG3 IFA14 IHD1 MEP1 MET14 MET3 PHR1 QDR1 TRY6WOR2 XYL2 ZSF1
Ume6p	0.15	1.6501e-06	CR_06310W_A ERG1 IHD1 IQG1 MET3 MOB1 NGT1 PHR1 XYL2
Cbf1p	0.2833	2.48811e-06	C1_10520W_A C1_14190C_A C3_01100W_A C6_04190C_A C6_04420W_ACDC20 CR_02890C_A CR_04770C_A CR_05210W_A ERG1 FTH1 MEP1 MET14MET3 OPT7 WOR2 YOX1
Wor3p	0.1	3.06626e-06	C1_01930W_A C1_11990W_A C7_03560W_A HPD1 IHD1 NGT1
Rgt1p	0.0667	3.61887e-06	C7_03560W_A IHD1 NGT1 QDR1
Cta8p	0.3167	4.47011e-06	ASH1 C1_01930W_A C1_11990W_A C1_14190C_A C2_01630W_AC2_10600W_A C3_07470W_A C6_04420W_A CR_05210W_A ERG3 HAK1 HOF1IFA14 IQG1 MET14 MET3 MOB1 PHR1 QDR1
Met4p	0.0833	1.03302e-05	C1_11990W_A C6_04420W_A CR_01440C_A PGA48 QDR1
Taf14p	0.0667	4.66277e-05	C6_04420W_A IHD1 PHR1 ZSF1
Wor1p	0.15	4.95844e-05	ADH3 C1_11990W_A C4_03000C_A C4_03960W_A ERG3 IFA14 WOR2 XYL2YOX1
Mrr1p	0.1667	6.69863e-05	ADH3 C1_11990W_A ERG3 FTH1 HOF1 IFA14 MEP1 PHHB WOR2 ZSF1
Rob1p	0.2	0.000158364	ADH3 C1_10170W_A C1_14190C_A C2_01630W_A C3_07470W_AC7_03560W_A IHD1 IQG1 MMS21 NGT1 PHR1 ZSF1
Zfu2p	0.1333	0.000190703	C2_09420W_A C6_04190C_A C7_03560W_A IHD1 MEP1 MET3 TRY6 WOR2
Bcr1p	0.1167	0.000220148	C6_04420W_A CR_01440C_A IHD1 PGA48 PHR1 WOR2 XYL2
Ace2p	0.2	0.000222367	ASH1 C1_11990W_A C1_14190C_A C3_07470W_A CR_05210W_A ERG1IHD1 MET14 MET3 PGA48 PHR1 WOR2
Put3p	0.0167	0.000326892	CR_02890C_A
Gat1p	0.0167	0.000326892	MEP1
Brg1p	0.1	0.000361691	C1_11990W_A C6_04190C_A CR_01440C_A IHD1 OPT7 WOR2
Rpn4p	0.05	0.000632059	C6_04420W_A IHD1 PGA48
Gln3p	0.0167	0.000777389	MEP1
Sfu1p	0.0333	0.000817709	FTH1 MET3
Zcf8p	0.1	0.00105509	C2_09420W_A C2_10650W_A C6_04190C_A CR_01440C_A IHD1 MEP1
Rlm1p	0.05	0.00122394	C6_04190C_A IHD1 MET3
Cph1p	0.05	0.00212499	C4_03000C_A IHD1 PHR1
Wor2p	0.05	0.00279398	C1_11990W_A IFA14 WOR2
Cwt1p	0.0833	0.00343008	C2_01630W_A HAK1 HPD1 IHD1 MET14
Try5p	0.0333	0.00373996	CR_01440C_A QDR1
Zcf31p	0.0167	0.00396771	C6_04420W_A
Try3p	0.0333	0.00406867	C6_04420W_A QDR1
Hmo1p	0.1667	0.00426421	C1_10520W_A C5_03690W_A C6_04190C_A C7_01390W_A ERG3 HOF1MEP1 PHR1 WOR2 YOX1
Flo8p	0.0167	0.00437206	IHD1
Not3p	0.0167	0.00523538	PGA48
Hap43p	0.1333	0.00541246	C1_10170W_A C1_14190C_A C2_01630W_A C7_01650W_A CR_05210W_AHAK1 OPT7 QDR1
Try4p	0.1	0.00582742	C1_01930W_A C6_04190C_A C6_04420W_A MEP1 QDR1 XYL2
Czf1p	0.0167	0.00770425	WOR2
Hms1p	0.05	0.00904432	C1_11990W_A CR_01440C_A ERG3
Wor4p	0.05	0.00904432	C1_11990W_A IFA14 WOR2
Zcf39p	0.0167	0.0132093	IHD1
Suc1p	0.0167	0.0146083	QDR1
Cap1p	0.0667	0.0175349	C2_01630W_A ERG1 MET3 ZSF1
Tac1p	0.0167	0.019167	ERG1
Efh1p	0.0167	0.0199779	XYL2
Rap1p	0.0167	0.029804	MET14
Tbf1p	0.05	0.0349401	CDC20 MET3 YOX1
Uga33p	0.0167	0.0379218	QDR1
Rfg1p	0.0333	0.0400906	IHD1 PHR1
Fhl1p	0.0333	0.0426295	ERG3 YOX1
Hac1p	0.0167	0.0538718	ERG3
Ahr1p	0.05	0.0906578	C4_03000C_A IHD1 WOR2
Mnl1p	0.0167	0.0912621	XYL2
Cup9p	0.0333	0.109865	C1_14190C_A HAK1
Gal4p	0.0167	0.132482	ERG1
Ifh1p	0.0167	0.155268	C2_09420W_A
Crz1p	0.0167	0.168613	MET3
